# Supplementary material for: Efficient asymmetric synthesis of an azasugar in water
Source: Royal Society of Chemistry journal article supplement (doi:10.1039/b500190k), 2005-01-01
Supplement: b500190k.pdf [file b500190k.pdf]

## Efficient Multistep Asymmetric Synthesis of an Azasugar in Water

Ulf M. Lindström,\* Rui Ding, and Olle Hidestål

*Department of Organic Chemistry, Lund University, P. O. Box 124, SE-221 00 Lund, Sweden*

### SUPPLEMENTARY INFORMATION

#### General remarks

<sup>1</sup>H and <sup>13</sup>C NMR spectra were recorded on Bruker DRX 300 MHz using the residual peaks of CHCl<sub>3</sub> ( $\delta$  7.26) in CDCl<sub>3</sub>, of MeOH ( $\delta$  3.30) in CD<sub>3</sub>OD, or that of H<sub>2</sub>O ( $\delta$  4.80) in D<sub>2</sub>O as reference. Optical rotations,  $[\alpha]_D$ , were measured on a Perkin-Elmer 341 polarimeter at the sodium D line and at ambient temperature. High resolution mass spectra were recorded on a JEOL SX-102 spectrometer. Analytical thin layer chromatography was performed on Merck silica gel 60 F<sub>254</sub> plates, and the plates were visualized with UV light and the phosphomolybdic acid/cerium sulphate staining reagent (purchased from Aldrich as a 20 wt% solution in ethanol but diluted to ca 5 wt% before use). Reverse solid phase extraction was performed on Sep-Pak columns purchased from Waters. Distilled water was used in all reactions and commercial reagents were used as received from the supplier.

Experimental procedure and analytical data for compound **3** can be found elsewhere.<sup>1</sup>

#### (2*E*,4*S*,5*R*)-6-Bromo-hex-2-en-1,4,5-triol (**4**):

Dibromide **2** (70 mg, 0.255 mmol) was stirred in water (4 mL) for 3 h at 50 °C. The acidic solution was then neutralized with solid NaHCO<sub>3</sub> (21 mg, 0.255 mmol). Filtration through a C18 reverse phase plug (5g) using water then methanol as eluent afforded 90-95% pure **4** (53 mg, 98%), after concentration of appropriate fractions, and was used as such in the subsequent step. A pure sample was obtained by flash column chromatography on silica gel (ethyl acetate/methanol 95/5). M.p: 77-78 °C;  $[\alpha]_D$  -34.1 (c=5.3 in MeOH); <sup>1</sup>H NMR (CDCl<sub>3</sub>, 300 MHz):  $\delta$  6.05 (ddt,  $J$  = 15.7, 5.0, 1.0 Hz, 1H), 5.80 (ddt,  $J$  = 15.6, 6.6, 1.6 Hz, 1H), 4.27 (t,  $J$  = 5.7 Hz, 1H), 4.23 (d, 4.8 Hz, 2H), 3.75 (m, 1H), 3.60 (dd,  $J$  = 10.6, 4.3 Hz, 1H), 3.47 (dd,  $J$  = 10.6, 6.6 Hz, 1H), 2.72 (br s, 1H), 2.42 (br s, 1H); <sup>13</sup>C NMR (CDCl<sub>3</sub>, 75 MHz):  $\delta$  133.3, 129.0, 73.6, 73.1, 62.6, 35.3. HRMS (ES<sup>+</sup>) found 232.9822, calcd for C<sub>6</sub>H<sub>11</sub>O<sub>3</sub>BrNa (M+Na) 232.9792.

*4,5-Anhydro-1-bromo-1-deoxy-L-idoitol (5)*:

To a stirred solution of **4** (50 mg, 0.237 mmol) in water (1.5 mL) was added  $K_2[W_2O_3(O_2)_4(H_2O)_2]$  (2.4 mg, 0.0047 mmol). After 8 h at room temperature, the reaction mixture was eluted through a C18 reverse phase plug (5 g) using water then methanol as eluent. After concentration of appropriate fractions, epoxy alcohol **5** (53 mg, 99%) was obtained in 84% *de*,<sup>2</sup> as a colorless oil. <sup>1</sup>H NMR (300 MHz, CD<sub>3</sub>OD, mixture of isomers):  $\delta$  3.86-3.75 (m, 2H), 3.64-3.50 (m, 3H), 3.43 (dd, *J* = 10.4, 6.9 Hz, 1H), 3.15-3.01 (m, 2H); <sup>13</sup>C NMR (75 MHz, CD<sub>3</sub>OD, major isomer):  $\delta$  76.8, 75.8, 65.1, 60.2, 59.5, 37.6. HRMS (ES+) found 248.9760, calcd for C<sub>6</sub>H<sub>11</sub>O<sub>4</sub>BrNa (M+Na) 248.9738.

*(2S,3S,4S)-2-[(1R)-1,2-dihydroxyethyl]pyrrolidine-3,4-diol (1)*:

To a 5 mL round-bottomed flask containing epoxy alcohol **5** (51 mg, 0.225 mmol) was added a solution of 10% aq. NH<sub>3</sub> (2 mL). After stirring at room temperature for 3 h, K<sub>2</sub>CO<sub>3</sub> (62 mg, 0.450 mmol) was added and the solution then heated at 70 °C for 1 h. The reaction mixture was then concentrated and the residue subjected to flash column chromatography eluting with ethanol/methanol/25% aq. NH<sub>3</sub> (10/10/1) to give enantiomerically pure **1** (32 mg, 88%). M.p: 133-135 °C, Lit.<sup>3</sup> 134-135 °C;  $[\alpha]_D +3.6$  (*c* = 0.8, H<sub>2</sub>O), Lit.<sup>3</sup> +2.8 (*c*=2.0); <sup>1</sup>H NMR (300 MHz, D<sub>2</sub>O):  $\delta$  4.13 (m, 1H), 4.06 (m, 1H), 3.79-3.68 (m, 2H), 3.58 (dd, *J* = 11.7, 4.8 Hz, 1H), 3.10 (dd, *J* = 12.3, 5.0 Hz, 1H), 2.98-2.86 (m, 2H); <sup>13</sup>C NMR (75 MHz, D<sub>2</sub>O):  $\delta$  80.8, 79.7, 74.2, 73.9, 68.2, 65.9, 53.2. HRMS (FAB+) found 164.0925, calcd for C<sub>6</sub>H<sub>14</sub>NO<sub>4</sub> 164.0923.

## References and Footnotes

- (1) O. Hidestål, R. Ding, A. Almesåker, U. M. Lindström, *Green Chemistry*, **7**, 2005, in press.
- (2) The diastereomeric ratio was determined by integrating the peaks in the <sup>13</sup>C NMR spectrum. The peaks from the two diastereomers in the <sup>1</sup>H NMR spectrum were overlapping.
- (3) R. C. Bernotas, *Tetrahedron Lett.*, 1990, **31**, 469.
